# At Least Three Doses of Leading Vaccines Essential for Neutralisation of SARS-CoV-2 Omicron Variant

1

2 Nagendrakumar B Singanallur<sup>1†</sup>, Petrus Jansen van Vuren<sup>1†</sup>, Alexander J McAuley<sup>1†</sup>, Matthew  
3 P Bruce<sup>1</sup>, Michael J Kuiper<sup>2</sup>, Stella M Gwini<sup>3</sup>, Shane Riddell<sup>1</sup>, Sarah Goldie<sup>1</sup>, Trevor W Drew<sup>1</sup>,  
4 Kim R Blasdell<sup>1</sup>, Mary Tachedjian<sup>1</sup>, Shruthi Mangalaganesh<sup>1,4</sup>, Simran Chahal<sup>1</sup>, Leon Caly<sup>5</sup>,  
5 Julian D Druce<sup>5</sup>, Jennifer A Juno<sup>6</sup>, Stephen J Kent<sup>6</sup>, Adam K Wheatley<sup>6</sup>, Seshadri S Vasan<sup>1,7\*</sup>

6 <sup>1</sup>Commonwealth Scientific and Industrial Research Organisation (CSIRO) Australian Centre for  
7 Disease Preparedness (ACDP), Geelong, VIC 3220, Australia

8 <sup>2</sup>Data61, Commonwealth Scientific and Industrial Research Organisation (CSIRO), Docklands, VIC  
9 3008, Australia

10 <sup>3</sup>University Hospital Geelong, Barwon Health, Geelong, VIC 3220, Australia

11 <sup>4</sup>Monash Biomedicine Discovery Institute, Monash University, Clayton, VIC 3168, Australia

12 <sup>5</sup>Victorian Infectious Diseases Reference Laboratory (VIDRL), The Peter Doherty Institute for  
13 Infection and Immunity, Melbourne, VIC 3000, Australia

14 <sup>6</sup>Department of Microbiology and Immunology, University of Melbourne, The Peter Doherty  
15 Institute for Infection and Immunity, Melbourne, VIC 3000, Australia

16 <sup>7</sup>Department of Health Sciences, University of York, York, YO10 5DD, United Kingdom

17 <sup>†</sup>These authors have contributed equally to this work and share first authorship

18 \*Correspondence:

19 Prof. Seshadri S. Vasan, [vasan.vasan@csiro.au](mailto:vasan.vasan@csiro.au); [orcid.org/0000-0002-7326-3210](https://orcid.org/0000-0002-7326-3210)

## 20 Abstract

21 Plasma samples taken at different time points from donors who received either AstraZeneca  
22 (Vaxzevria) or Pfizer (Comirnaty) or Moderna (Spikevax) coronavirus disease-19 (COVID-19)  
23 vaccine were assessed in virus neutralization assays against Delta and Omicron variants of concern  
24 and a reference isolate (VIC31). With the Pfizer vaccine there was 6-8-fold reduction in 50%  
25 neutralizing antibody titres (NT<sub>50</sub>) against Delta and VIC31 at 6 months compared to 2 weeks after  
26 the second dose; followed by 25-fold increase at 2 weeks after the third dose. Neutralisation of  
27 Omicron was only consistently observed 2 weeks after the third dose, with most samples having titres  
28 below the limit of detection at earlier timepoints. Moderna results were similar to Pfizer at 2 weeks  
29 after the second dose, while the titres for AstraZeneca samples derived from older donors were 7-fold  
30 lower against VIC31 and below the limit of detection against Delta and Omicron. Age and gender  
31 were not found to significantly impact our results. These findings indicate that vaccine matching may  
32 be needed, and that at least a third dose of these vaccines is necessary to generate sufficient  
33 neutralising antibodies against emerging variants of concern, especially Omicron, amidst the  
34 challenges of ensuring vaccine equity worldwide.

35 **Keywords:** AlphaFold; BA.1.1; biomolecular modelling; COVID-19; neutralising antibody  
36 titres; SARS-CoV-2; Spike protein; variants of concern; vaccines; vaccine matching

## 37 Introduction

## Neutralization of SARS-CoV-2 Omicron

38 The novel coronavirus disease-19 (COVID-19) pandemic caused by the severe acute  
39 respiratory syndrome coronavirus-2 (SARS-CoV-2) has resulted in over half a billion cases and 6.2  
40 million deaths, and is yet to be brought under control [1]. Only 14.2 vaccine doses have been  
41 administered per 100 people in ‘low-income countries’; for ‘lower middle income countries’  
42 excluding India the number is 81.6 doses per 100 people [2]. Thus, half the world’s population is still  
43 receiving the first dose of a COVID-19 vaccine and is very vulnerable [3]. Although vaccines can  
44 reduce the likelihood of infection, re-infection and disease severity in individuals, and to an extent  
45 community transmission, the continuous emergence of SARS-CoV-2 variants of concern (VOC) has  
46 frustrated global response efforts and highlighted the importance of continued assessment of vaccine  
47 efficacy [4,5]. The World Health Organization has declared 5 VOC to date, viz. Alpha (18 December  
48 2020), Beta (18 December 2020), Gamma (11 January 2021), Delta (11 May 2021), Omicron (26  
49 November 2021), of which Delta and Omicron are currently of the greatest concern and two variants  
50 of interest (VOI) viz. Lambda (14 June 2021) and Mu (30 August 2021) [6].

51 While studies on T-cell responses will provide a more holistic picture of vaccine-induced  
52 efficacy, assessment of neutralising antibody reactivity against emerging VOC, such as Omicron  
53 (B.1.1.529, referred to as BA.1 henceforth), can help inform near-term public health response. This is  
54 especially important for the vaccines manufactured by Pfizer, Moderna, and AstraZeneca, as one or  
55 more of these three are approved in 192 countries (which does not include the People’s Republic of  
56 China), representing 77% of the world’s population [2]. In this study we have assessed the ability of  
57 human plasma samples collected from vaccinated donors at different timepoints to neutralise  
58 infectious SARS-CoV-2 virus isolates of the current two most globally-prevalent VOC (Delta and  
59 Omicron; particularly the under-studied Omicron BA.1.1 sub-lineage) compared with a reference  
60 isolate used in previous studies (VIC31; [7]). This adds to the collective evidence base of the efficacy  
61 of existing vaccines against the Omicron VOC (of which there are a number of sub-lineages), from  
62 the perspective of different experimental protocols (including cell lines) and regional patient and  
63 virus samples [4,5]. We have further bolstered our interpretation using *in silico* modelling of the  
64 respective Spike proteins and outlined our thoughts on future follow-up studies.

## 65 **Materials and Methods**

### 66 **SARS-CoV-2 Stock Generation and Characterisation**

67 Three SARS-CoV-2 isolates, VIC31 (B.1; hCoV-19/Australia/VIC31/2020 containing D614G  
68 mutation), Delta (B.1.617.2) variant of concern (hCoV-19/Australia/VIC18440/2021), and Omicron  
69 (BA.1.1) variant of concern (hCoV-19/Australia/VIC28585/2021) were provided by the Victorian  
70 Infectious Diseases Reference Laboratory (VIDRL; Melbourne, Australia). Virus stocks were  
71 propagated and titrated in Vero E6 cells (American Type Culture Collection (ATCC), Manassas, VA,  
72 USA) prior to use as previously outlined in [8]. Briefly, Vero E6 cells were grown in 150 cm<sup>2</sup> flasks  
73 in Dulbecco’s Modified Eagle Medium (DMEM) containing 10% heat-inactivated foetal bovine  
74 serum (FBS), 2mM GlutaMAX supplement, 100U/mL penicillin, and 100 µg/mL streptomycin (all  
75 components from ThermoFisher Scientific; Scoresby, VIC, Australia) until >80% confluent. Virus  
76 isolates were diluted 1:100 in DMEM (containing 2% FBS, 2mM GlutaMAX supplement, 100U/mL  
77 penicillin, and 100 µg/mL streptomycin), and 5 mL was used to inoculate Vero E6 cells for 1 hr at  
78 37°C/5% CO<sub>2</sub> before additional media was added to the flask. The flasks were incubated at 37°C/5%  
79 CO<sub>2</sub> for 48 h (for VIC31 and Delta) or 72 hr (for Omicron) before supernatant was clarified at 2,000  
80 x g for 10 min, and harvested and stored in 1 mL aliquots at -80°C.

## *Neutralization of SARS-CoV-2 Omicron*

81 Identity of virus stocks were confirmed by next-generation sequencing using a MiniSeq  
82 platform (Illumina, Inc; San Diego, CA, USA). In brief, 100  $\mu$ L cell culture supernatant from  
83 infected Vero E6 cells was combined with 300  $\mu$ L TRIzol reagent (Thermo Fisher Scientific) and  
84 RNA was purified using a Direct-zol RNA Miniprep kit (Zymo Research; Irvine, CA, USA). Purified  
85 RNA was further concentrated using an RNA Clean-and-Concentrator kit (Zymo Research), followed  
86 by quantification on a DeNovix DS-11 FX Fluorometer. RNA was converted to double-stranded  
87 cDNA, ligated then isothermally amplified using a QIAseq FX single cell RNA library kit (Qiagen,  
88 Hilden, Germany). Fragmentation and dual-index library preparation was conducted with an Illumina  
89 DNA Prep, Tagmentation Library Preparation kit. Average library size was determined using a  
90 Bioanalyser (Agilent Technologies; San Diego, CA, USA) and quantified with a Qubit 3.0  
91 Fluorometer (Invitrogen; Carlsbad, CA, USA). Denatured libraries were sequenced on an Illumina  
92 MiniSeq using a 300-cycle Mid-Output Reagent kit as per the manufacturer's protocol. Paired-end  
93 Fastq reads were trimmed for quality and mapped to the published sequence for the SARS-CoV-2  
94 reference isolate Wuhan-Hu-1 (RefSeq: NC\_045512.2) using CLC Genomics Workbench version 21  
95 from which consensus sequences were generated. Stocks were confirmed to be free from  
96 contamination by adventitious agents by analysis of reads that did not map to SARS-CoV-2 or cell-  
97 derived sequences.

### 98 **Human Plasma Samples**

99 Blood samples in EDTA blood collection tubes (BD Biosciences, Australia) were collected  
100 from healthy volunteers, aged between 25-70 (both female and male), who received COVID-19  
101 vaccine manufactured by either AstraZeneca (Vaxzevria/AZD1222; University of Oxford-  
102 AstraZeneca, Oxford/Cambridge, UK), Pfizer (Comirnaty/BNT162b2; BioNTech-Pfizer, Brooklyn,  
103 New York, USA), or Moderna (Spikevax/mRNA-1273; Moderna Inc, Cambridge, MA, USA) (**Table**  
104 **1**). AstraZeneca vaccine was advised for the age group >60 [9]. All groups received the same vaccine  
105 (homologous) for first and second doses. Most of the Pfizer vaccine group also received a third dose  
106 as homologous booster, while the groups that received AstraZeneca or Moderna did not post-third  
107 dose samples available. Plasma was separated and stored at -70°C until use. The study protocols  
108 were approved by institutional ethics committees of the Peter Doherty Institute, Melbourne Australia  
109 [University of Melbourne Central Human Research Ethics Committee (2021-21198-15398-3)] and  
110 the CSIRO (CSIRO Human Research Ethics Committee ID 2021\_123\_RR). Biosafety protocols for  
111 handling the human samples and the infectious agents were approved by the Institutional Biosafety  
112 Committee of ACDP, Geelong before infectious work commenced. Blood samples were collected on  
113 the day of vaccination (baseline; pre-1<sup>st</sup> dose) and 2 weeks post second dose (2wk-2<sup>nd</sup> dose) for all  
114 the vaccine groups and after six months of 2<sup>nd</sup> dose (6mo-2<sup>nd</sup> dose) and two weeks post third dose  
115 (2wk-3<sup>rd</sup> dose) for the Pfizer group.

### 116 **Live-Virus Neutralisation Assays**

117 Virus neutralization assays (VNT) were carried out using Vero E6 cells as described previously  
118 [8]. Briefly, each plasma sample for the three vaccines was diluted 1:10 in Dulbecco's Phosphate  
119 Buffered Saline (DPBS; Thermo Fisher Scientific, Waltham, MA, USA) in a deep-well plate,  
120 followed by a two-fold serial dilution up to 1:1,280. The dilution series for each plasma sample was  
121 dispensed into triplicate columns of a 96-well plate (one plate per isolate), for a total volume of 50  $\mu$ l  
122 per well. For the plasma-containing wells, 50  $\mu$ l virus diluted in DMEM (Thermo Fisher Scientific,  
123 Waltham, MA, USA) containing 2% FBS, 2mM GlutaMAX supplement, 100U/mL penicillin, and  
124 100  $\mu$ g/mL streptomycin to contain approximately 100 TCID<sub>50</sub> (checked by back-titration) was added  
125 to each well. The plates were incubated at 37°C/5% CO<sub>2</sub> for 1 h to allow neutralization complexes to

## Neutralization of SARS-CoV-2 Omicron

126 form between the antibodies present in the plasma and the virus. A positive control serum was  
127 included to confirm the reproducibility of the assay. At the end of the incubation, 100  $\mu$ l Vero E6  
128 cells ( $2 \times 10^4$  cells/well) were added to each well and the plates were returned to the incubator for 4  
129 days. Each well was scored for the presence of viral CPE, readily discernible on Day 4 post-infection.  
130  $NT_{50}$  neutralization titres calculated using the Spearman–Kärber formula [10] and transformed to  $\log_2$   
131 values for analysis. Replicates that did not show neutralisation at 1:10 were scored <1:10 dilution and  
132 assigned a value 1:5 for statistical analysis in line with the current best practice [11].

### 133 *In silico* Modelling

134 Molecular models were made of the trimeric Omicron Spike protein from residues 13 to 1160  
135 (omitting the transmembrane domain) consistent with variant BA.1.1 and including glycosylation to  
136 visualize structural changes from the original strain. ‘AlphaFold’ [12] was used to reconstruct the N-  
137 terminal domain due to insertions and deletions. Models were built to include the ‘up’ and ‘down’  
138 conformations of the Receptor Binding Domain (RBD, residues 330-530) as well as the human  
139 angiotensin converting enzyme 2 (ACE2) receptor. Building upon our previous work [13], models  
140 were solvated and simulated using ‘NAMDv2.14’ software [14] for over 200 nanoseconds before  
141 visual assessment of changes to surface epitopes and receptor binding interfaces. More modelling  
142 details included in Supplementary Methods.

### 143 Statistical Analysis

144  $NT_{50}$  values were analysed and expressed as Log base 2 ( $\log_2$ ). The VNT data were grouped  
145 based on vaccines, sex (female and male), and age groups (<35 – young; 35-60 – middle and >60 –  
146 senior). Both one-way and two-way Analysis of Variance (ANOVA) were used to test the statistical  
147 differences between vaccines, sex, age, day post vaccination/booster, variants, and their interactions.  
148 If the ANOVA results returned a p-value of <0.05, a *post hoc* test with a Tukey’s range test (Tukey’s  
149 Honestly Significant Difference, c.f. Supplementary Tables) was performed to measure the  
150 interactions between two variables. Plots were drawn using ‘ggplot2’ and modified in Adobe  
151 Illustrator for clarity. All statistical procedures used the ‘car’ and ‘lme4’ libraries in R [15]. Fold  
152 changes were calculated as:  $2^{(\log_2 x - \log_2 y)}$ .

## 153 Results and Discussion

### 154 Neutralisation of Delta and Omicron Variants of Concern

155 As neutralising antibody titres are a known correlate of protection for SARS-CoV-2 [16],  
156 neutralisation assays were performed against SARS-CoV-2 VIC31, Delta, and Omicron using plasma  
157 samples collected from human volunteers. **Table 1** shows the median ages for AstraZeneca sample  
158 donors are 57.5 compared to 38.5 for Moderna, and 33 for Pfizer vaccine donors respectively, the  
159 reasons for which are as follows. The Australian Technical Advisory Group on Immunisation  
160 (ATAGI) changed its recommendations regarding the AstraZeneca vaccine following reports of  
161 thrombotic thrombocytopenia syndrome (TTS) emerging from vaccinated adults [17]. It is worth  
162 noting that some individuals younger than 60 have received AstraZeneca vaccine following an  
163 assessment by a qualified health professional and with a verbal or written consent as provisioned by  
164 the Department Health, Government of Australia [9], but there is no brand preference for people aged  
165 60 years and above because the benefits outweigh the risk of TTS in this age group. As a result,  
166 samples predominantly originated from young and middle-aged individuals for the Moderna and  
167 Pfizer vaccines, and from middle-aged and senior adults for the AstraZeneca vaccine. Given the large

## Neutralization of SARS-CoV-2 Omicron

168 age range for the Pfizer vaccine, for this manuscript we classified the age groups in to young (<35  
169 age), middle (35-60) and senior (>60). We chose 35 as the cut-off for middle age as it generally  
170 corresponds to parents of teen aged children and is used in metrics such as the Peterson-KFF health  
171 System Tracker [18] which has identified COVID-19 as the second and third most important cause of  
172 death of people who are over and under 35, respectively. In Australia, Moderna vaccine was  
173 approved for use relatively recently (9 August 2021), while a third dose of the AstraZeneca is only  
174 approved in exceptional circumstances, therefore this study did not have access to third-dose samples  
175 for these vaccines.

176 Calculation of fold changes using the data presented in **Table 2** and **Figure 1**, demonstrate that  
177 for the Pfizer vaccine there was an 8.2- and 5.5-fold reduction in NT<sub>50</sub> titres against VIC31 and Delta  
178 respectively 6 months after second dose administration (compared to two weeks), while the average  
179 titre against Omicron decreased from an estimated 1:6.3 (only 4/15 samples had quantifiable  
180 neutralization) to below assay detection limit for all samples at the same time points, demonstrating  
181 that levels of circulating neutralising antibodies decrease in the months following vaccination.  
182 Subsequently there was a 25.5- and 24.6-fold increase in titres against VIC31 and Delta respectively  
183 two weeks after a third dose administration (compared to 6 month post-second dose), while the  
184 average titre against Omicron increased from below assay detection limit to 1:48.5 at the same time  
185 points. Because of the aforementioned limitations, calculation of such fold changes for AstraZeneca  
186 and Moderna were not possible. However, it is worthwhile to compare their neutralisation titres two  
187 weeks post-second dose relative to the Pfizer vaccine samples. Across all three variants, we did not  
188 find any significant difference between Pfizer and Moderna vaccines by 2<sup>nd</sup> week post second dose of  
189 the vaccines (**Supplementary Table S1**). Interestingly, the neutralisation titres against VIC31 were  
190 generally lower than have been reported in other studies with equivalent samples and virus isolates.  
191 This is likely a reflection of the protocol and cells used in this study, and the age groups/populations  
192 from which the samples were collected [4].

193 ANOVA (one-way and two-way) was used to investigate the interactions of age, sex, vaccine,  
194 and day post vaccination/booster with neutralising antibody titres to the three different virus variants.  
195 One-way and two-way ANOVA analyses showed that, for all vaccines (Pfizer, Moderna and  
196 AstraZeneca), day post vaccination/booster and virus variant were the main contributors to  
197 differences in neutralising antibody responses, while age and sex did not have significant effects.  
198 Based on ANOVA analysis there was no significant difference in neutralising titres based on age or  
199 sex for any of the vaccines (**Supplementary Tables S2 & S3; Figure 2A-C**). The titres were  
200 dependent on the vaccine, day post-vaccination and variant ( $p < 0.001$ ) and to an extent the age where  
201 antibody titres in young showed statistically significant difference when 2<sup>nd</sup> compared to the middle and  
202 senior age groups ( $p = 0.022$ ). The antibody titres against Omicron have a negative slope and  
203 indicating that there is poor neutralisation with the variant.

### 204 **Importance of Third Dose for Neutralisation of Omicron**

205 In line with recent findings in similar studies by other groups [19,20], Omicron titres were  
206 significantly lower than VIC31-D614G and Delta titres at all time points and regardless of vaccine,  
207 highlighting the concern of poor protection to Omicron following vaccination by any of the three  
208 leading vaccines. One shortcoming of our data is the lack of later samples and post-boost (third  
209 vaccination) from individuals vaccinated with AstraZeneca and Moderna vaccines. However, the data  
210 available from Pfizer vaccinated individuals at 6 months after receiving their second dose indicate a  
211 significant waning of immunity to all three variants over this period. Neutralising antibody levels to  
212 Omicron were low or undetectable in most individuals two weeks after receiving two Pfizer doses,

## Neutralization of SARS-CoV-2 Omicron

213 and below the assay limit of detection in all samples tested at 6 months after the second dose.  
214 However, at two weeks after the booster vaccination (third Pfizer dose), a significant booster effect in  
215 neutralising titres was noted to all three variants. This highlights the importance of the need for a  
216 booster (third) vaccine dose for ongoing protection against D614G and Delta variants, but more  
217 importantly that two doses are insufficient to stimulate significant neutralising protection against  
218 Omicron BA.1, therefore making the third dose essential. The cause of better protection against  
219 Omicron BA.1 following three doses of vaccine incorporating Spike protein lacking Omicron  
220 specific mutations, is likely due to higher overall neutralising titres due to a booster effect despite  
221 neutralising antibodies to certain epitopes being circumvented.

### 222 **Modelling and Analyses using *in silico* methods**

223 In order to identify a mechanistic explanation for the observed reduction in neutralisation of  
224 Omicron compared to other variants, we investigated the amino acid mutations present in Omicron.  
225 Consistent with other studies, there are significantly more mutations in the Spike protein of the  
226 Omicron variant shown in **Figure 4A**, (37 mutations in the BA.1 variant, 32 in the BA.2 variant  
227 including insertions and deletions), compared to the Delta variant (10 mutations), while only one in  
228 the VIC31 strain (D614G). The Omicron mutations contribute to its ability to circumvent vaccine or  
229 infection induced neutralising antibody responses [19,20]. Three of these mutations (G142D, T478K  
230 and D614G) are common to Delta and Omicron, however we have previously shown experimentally  
231 and through *in silico* modelling that D614G has no significant impact on vaccines [7]. In the receptor  
232 binding domain (RBD) of the Spike protein alone, which is most immunologically exposed in its ‘up’  
233 configuration and critical for ACE2 binding, there are 15 and 17 mutations in the Omicron BA.1 and  
234 BA.2 variants compared to only 2 in Delta as shown in **Figures 4A & C**. Many of the observed  
235 Omicron mutations by our analysis appear to be immune evasive, as they do not appear to be at the  
236 ACE2 binding interface and represent a significant change in the residue characteristics; in the RBD,  
237 these include N440K, K417N, S477N, T478K, and E484A.

238 Interestingly our isolate VIC28585 belongs to the BA.1.1 sub-lineage as it also contains the  
239 R346K spike mutation, which possibly further decreases antibody neutralization based on the  
240 reduced binding of class 2 antibodies in theoretical studies with the Mu variant of interest [21]. Next-  
241 generation sequencing results also indicated the presence of additional Spike mutations S373P and  
242 S375F in our VIC28585 isolate at frequency exceeding 99.8%; these two mutations with Grantham  
243 scores of 74 (moderately conservative change) and 155 (radical change) respectively are near the  
244 S371L Spike mutation characteristic to BA.1 which has a Grantham score of 145 (moderately radical  
245 change; *n.b.* these three mutations are also present in EPI\_ISL\_7869197 mentioned below). Thus, we  
246 have investigated the neutralising responses to Omicron BA.1.1 in individuals vaccinated with three  
247 leading COVID-19 vaccines and compared these neutralising titres to those against an early SARS-  
248 CoV-2 isolate with the D614G mutation (VIC31), and the Delta variant (B.1.617.2) that subsequently  
249 became the dominant variant worldwide prior to Omicron’s emergence. For example, on 11  
250 December 2021 the ratio of Delta : BA.1 : BA.1.1 : BA.2 : Other in USA (where extensive data is  
251 available from the CDC; [22]) was 92.5 : 5.2 : 2.2 : 0 : 0.2, and this steadily changed over two  
252 months so that on 12 February 2021 the ratio was 0 : 22.9 : 73.2 : 3.9 : 0. This shows that BA.1.1,  
253 used in our study, could emerge as the dominant variant although we need to wait for more  
254 comprehensive data from around the world – as of 16 February 2022, 719,364 sequences of BA.1  
255 were reported from 139 countries, while 410,015 sequences of BA.1.1 were reported from 127  
256 countries.

## Neutralization of SARS-CoV-2 Omicron

257 Other Omicron mutations are likely to confer increased binding affinity to ACE2 by increasing  
258 molecular interactions such as salt bridges and pi-stacking [12]; these mutations include Q493R and  
259 Q498R (increasing salt bridge interactions with ACE2's D38 and E35) and N501Y (also seen in  
260 Alpha, Beta and Gamma variants, pi-stacking with ACE2's Y41, shown in **Supplementary Figure**  
261 **S1**. A cluster of mutations S371L, S373P and S375F, interestingly appear co-located with Y505H in  
262 adjacent RBD domains in the 'down' position. These serine mutations, as well as significantly  
263 altering epitope presentation of the RBD domain by creating a more rigid structural motif, may allow  
264 H505 to interact with the adjacent F375, potentially modulating 'up'/'down' conformations via the  
265 ionizable H505, (pK<sub>a</sub> of 6.0). This structural change may coincide with the observed Omicron  
266 preference of infection to the bronchus, where pH is usually lower at 5.5 to 6.5, compared to the lung  
267 [23,24] (**Supplementary Figure S2**).

268 With the large number of mutations, it is unsurprising that the Omicron variant displays the  
269 observed antibody evasion and replicative advantage over earlier variants as seen in other studies and  
270 experimentally observed in this study [3,25]. Our biomolecular modelling shows sufficient  
271 distinction between BA.1 and BA.2, therefore future studies should experimentally compare the two.

### 272 **Public Health Implications and Future Studies**

273 The data we present here highlight the importance of booster vaccination for adequate  
274 protection against newly emerging variants such as Omicron BA.1.1, particularly the observation that  
275 two doses of the three leading vaccines are not sufficient for neutralisation of Omicron, while a third  
276 dose of Pfizer resulted in detectable neutralisation titres in all donor samples. Further studies are  
277 needed to perform similar analyses of neutralising titres in individuals receiving "heterologous"  
278 booster doses, e.g., initial AstraZeneca vaccination followed by Moderna or Pfizer boost, or Pfizer-  
279 Moderna / Moderna-Pfizer.

280 In the early days of the pandemic, the scientific prediction was that SARS-CoV-2 will have a  
281 mutation rate similar to SARS-CoV ( $0.8-2.4 \times 10^{-3}$ ) thanks to the 3'-to-5' exoribonuclease  
282 'proofreading mechanism' in coronaviruses [26], which was thought to result in a reduction in the  
283 mutation rate ( $\sim 10^{-6}$  per site per cycle) compared to influenza ( $\sim 3 \times 10^{-5}$  per site per cycle) [27,28].  
284 Therefore, it was predicted that vaccine matching may not be required as frequently as seasonal  
285 influenza (once a year each for Northern and Southern hemispheres), although this was hard to say  
286 definitively because SARS-CoV-2's genetic drift was uncertain with respect to the long-lasting  
287 efficacy of vaccine candidates then under development [29]. Early studies, for instance between 1  
288 February to 1 May 2020 seemed to confirm the mutation rate prediction with a median estimate of  
289  $1.12 \times 10^{-3}$  per site-year ([30]; we believe their upper 95% confidence interval should read  $1.85 \times 10^{-3}$ ).

290 Two years on, we have increasing evidence, including from this work, that the primary  
291 immunization schedule should consist of three rather than two doses, and indeed many countries are  
292 redefining 'fully vaccinated' status as three doses of these vaccines [31]. It is early to speculate on  
293 annual boosters beyond the third dose, although Israel has started to expand its fourth dose  
294 administration to groups beyond the immunocompromised [32,33]. These developments make it all  
295 the more important to ensure vaccine equity across the world, so everyone is adequately protected  
296 and highlight the potential need for vaccine matching to increase protection against infection.  
297 Vaccines using Spike as the primary antigen should consider including mutations common to BA.1,  
298 BA.1.1, and BA.2; development of vaccines with additional antigens, other than Spike, targeting  
299 more conserved viral factors should also be explored. This view is further supported by a recent  
300 preprint currently under peer review suggesting that, although a fourth dose restored anti-Omicron

## Neutralization of SARS-CoV-2 Omicron

301 BA.1 (EPI\_ISL\_7869197) neutralising antibody titres to a level observed post-third dose,  
302 breakthrough Omicron infections were common with high virus titres, albeit with very mild clinical  
303 signs [33,34].

304 In this context, it is important to explore vaccines that can better withstand mutations to the  
305 Spike protein better, and ideally have less dependence on cold chain. In addition to repeating this  
306 work with Omicron BA.2, it is also important to explore the benefits of T-cell immunity and  
307 heterologous boosting (which are beyond the scope of this paper; but see for instance these studies  
308 [35-38]). Another aspect worth exploring is intranasal administration of selected vaccines. In the  
309 earliest study (conducted from March 2020) looking at intranasal administration of the AstraZeneca  
310 vaccine [39], we found that although neutralising antibody titres were 2-fold lower in ferrets  
311 receiving two doses of this vaccine intranasally compared to the intramuscular route, the former was  
312 more protected using virus shedding as an infection metric [40]. These findings were subsequently  
313 confirmed in hamsters and non-human primates [41], and also reportedly led to a small clinical trial  
314 in 30 humans [42]. We feel that the intranasal route, and the role of mucosal immunity, needs to be  
315 explored more comprehensively given that the AstraZeneca vaccine has the widest reach (183  
316 countries worldwide), with over 2.5 billion doses administered [43].

317

### 318 References

- 319 1. Ritchie H, Mathieu E, Rodés-Guirao L, Appel C, Giattino C, Ortiz-Ospina E, et al.  
320 Coronavirus Pandemic (COVID-19) [Internet]. Our World in Data. 2020 [cited 20 February  
321 2022]. Available from: <https://ourworldindata.org/coronavirus>
- 322 2. World Bank. *World Bank Country and Lending Groups* (2022). Available at:  
323 [https://datahelpdesk.worldbank.org/knowledgebase/articles/906519-world-bank-country-and-](https://datahelpdesk.worldbank.org/knowledgebase/articles/906519-world-bank-country-and-lending-groups)  
324 [lending-groups](https://datahelpdesk.worldbank.org/knowledgebase/articles/906519-world-bank-country-and-lending-groups)
- 325 3. Jansen van Vuren, P, McAuley, AJ, Kuiper MJ, Singanallur, NB, Bruce, MP, et al. Highly  
326 thermotolerant SARS-CoV-2 vaccine elicits neutralising antibodies against Delta and  
327 Omicron in mice. *Viruses* (2022) 14(4): 800. doi: 10.3390/v14040800.
- 328 4. WHO. *What recent evidence do we have that omicron is evading immunity and what are the*  
329 *implications?* (2022). Available at: [https://www.who.int/news-](https://www.who.int/news-room/events/detail/2022/02/14/default-calendar/save-the-date---what-recent-evidence-do-we-have-that-omicron-is-evading-immunity-and-what-are-the-implications)  
330 [room/events/detail/2022/02/14/default-calendar/save-the-date---what-recent-evidence-do-we-](https://www.who.int/news-room/events/detail/2022/02/14/default-calendar/save-the-date---what-recent-evidence-do-we-have-that-omicron-is-evading-immunity-and-what-are-the-implications)  
331 [have-that-omicron-is-evading-immunity-and-what-are-the-implications](https://www.who.int/news-room/events/detail/2022/02/14/default-calendar/save-the-date---what-recent-evidence-do-we-have-that-omicron-is-evading-immunity-and-what-are-the-implications)
- 332 5. WHO. *What evidence do we have that omicron is evading immunity and what are the*  
333 *implications?* (2021). Available at: [https://www.who.int/news-](https://www.who.int/news-room/events/detail/2021/12/15/default-calendar/who-global-consultation---what-evidence-do-we-have-that-omicron-is-evading-immunity-and-what-are-the-implications)  
334 [room/events/detail/2021/12/15/default-calendar/who-global-consultation---what-evidence-do-](https://www.who.int/news-room/events/detail/2021/12/15/default-calendar/who-global-consultation---what-evidence-do-we-have-that-omicron-is-evading-immunity-and-what-are-the-implications)  
335 [we-have-that-omicron-is-evading-immunity-and-what-are-the-implications](https://www.who.int/news-room/events/detail/2021/12/15/default-calendar/who-global-consultation---what-evidence-do-we-have-that-omicron-is-evading-immunity-and-what-are-the-implications)
- 336 6. WHO. *Tracking SARS-CoV-2 variants* (2022). Available at:  
337 <https://www.who.int/en/activities/tracking-SARS-CoV-2-variants/>
- 338 7. McAuley AJ, Kuiper MJ, Durr PA, Bruce MP, Barr J, Todd S, et al. Experimental and in  
339 Silico Evidence Suggests Vaccines Are Unlikely to Be Affected by D614G Mutation in  
340 SARS-CoV-2 Spike Protein. *npj Vaccines* (2020) 5(1):96. doi: 10.1038/s41541-020-00246-8.
- 341 8. Malladi SK, Patel UR, Rajmani RS, Singh R, Pandey S, Kumar S, et al. Immunogenicity and  
342 Protective Efficacy of a Highly Thermotolerant, Trimeric SARS-CoV-2 Receptor Binding  
343 Domain Derivative. *ACS Infectious Diseases* (2021) 7(8):2546-64. doi:  
344 10.1021/acsinfecdis.1c00276.



## Neutralization of SARS-CoV-2 Omicron

- 345 9. Australian Government Department of Health. *Vaxzevria (AstraZeneca)* (2022). Available at:  
346 <https://www.health.gov.au/initiatives-and-programs/covid-19-vaccines/approved->  
347 [vaccines/astrazeneca](https://www.health.gov.au/initiatives-and-programs/covid-19-vaccines/approved-vaccines/astrazeneca)
- 348 10. Kärber G. Beitrag Zur Kollektiven Behandlung Pharmakologischer Reihenversuche. *Naunyn-*  
349 *Schmiedebergs Archiv für experimentelle Pathologie und Pharmakologie* (1931) 162(4):480-  
350 3. doi: 10.1007/BF01863914.
- 351 11. Sitaras I, Personal Communication (16 February 2022) to S.S. Vasana.
- 352 12. Jumper J, Evans R, Pritzel A, Green T, Figurnov M, Ronneberger O, et al. Highly Accurate  
353 Protein Structure Prediction with AlphaFold. *Nature* (2021) 596(7873):583-9. doi:  
354 10.1038/s41586-021-03819-2.
- 355 13. Kuiper MJ, Wilson LOW, Mangalaganesh S, Lee C, Reti D, Vasana SS. “But Mouse, You Are  
356 Not Alone”: On Some Severe Acute Respiratory Syndrome Coronavirus 2 Variants Infecting  
357 Mice. *ILAR Journal* (2022). doi: 10.1093/ilar/ilab031.
- 358 14. Phillips JC, Hardy DJ, Maia JDC, Stone JE, Ribeiro JV, Bernardi RC, et al. Scalable  
359 Molecular Dynamics on Cpu and Gpu Architectures with NAMD. *J Chem Phys* (2020)  
360 153(4):044130. doi: 10.1063/5.0014475.
- 361 15. R-Core-Team. *R: A Language and Environment for Statistical Computing*; R Foundation for  
362 Statistical Computing: Vienna, Austria, 2019. Available online: <https://www.r-project.org/>
- 363 16. César Muñoz-Fontela C, Widerspich L, Albrecht RA, Beer M, Carroll, MW, et al. Advances  
364 and gaps in SARS-CoV-2 infection models. *PLoS Pathogens* (2022) 18(1): e1010161. doi:  
365 10.1371/journal.ppat.1010161.
- 366 17. Greinacher A, Thiele T, Warkentin TE, Weisser K, Kyrle PA, Eichinger S. Thrombotic  
367 Thrombocytopenia after ChAdOx1 NCoV-19 Vaccination. *New England Journal of Medicine*  
368 (2021) 384(22):2092-101. doi: 10.1056/NEJMoa2104840.
- 369 18. Peterson-KFF Health System Tracker. *COVID-19 leading cause of death ranking* (2022).  
370 Available at: <https://www.healthsystemtracker.org/>
- 371 19. Schmidt F, Muecksch F, Weisblum Y, Da Silva J, Bednarski E, Cho A, et al. Plasma  
372 Neutralization of the SARS-CoV-2 Omicron Variant. *New England Journal of Medicine*  
373 (2021) 386(6):599-601. doi: 10.1056/NEJMc2119641.
- 374 20. Rössler A, Riepler L, Bante D, von Laer D, Kimpel J. SARS-CoV-2 Omicron Variant  
375 Neutralization in Serum from Vaccinated and Convalescent Persons. *New England Journal of*  
376 *Medicine* (2022) 386(7):698-700. doi: 10.1056/NEJMc2119236.
- 377 21. Fratev F. R346k Mutation in the Mu Variant of SARS-CoV-2 Alters the Interactions with  
378 Monoclonal Antibodies from Class 2: A Free Energy Perturbation Study. *Journal of*  
379 *Chemical Information and Modeling* (2022) 62(3):627-31. doi: 10.1021/acs.jcim.1c01243.
- 380 22. CDC. *COVID Data Tracker* (2022). Available at: [https://covid.cdc.gov/covid-data-](https://covid.cdc.gov/covid-data-tracker/#datatracker-home)  
381 [tracker/#datatracker-home](https://covid.cdc.gov/covid-data-tracker/#datatracker-home)
- 382 23. Hui KPY, Ho JCW, Cheung M-c, Ng K-c, Ching RHH, Lai K-l, et al. SARS-CoV-2 Omicron  
383 Variant Replication in Human Bronchus and Lung Ex Vivo. *Nature* (2022). doi:  
384 10.1038/s41586-022-04479-6.
- 385 24. Fischer H, Widdicombe JH. Mechanisms of Acid and Base Secretion by the Airway  
386 Epithelium. *J Membr Biol* (2006) 211(3):139-50. Epub 20061107. doi: 10.1007/s00232-006-  
387 0861-0.
- 388 25. Liu L, Iketani S, Guo Y, Chan JFW, Wang M, Liu L, et al. Striking Antibody Evasion  
389 Manifested by the Omicron Variant of SARS-CoV-2. *Nature* (2021). doi: 10.1038/s41586-  
390 021-04388-0.

## Neutralization of SARS-CoV-2 Omicron

- 391 26. Zhao Z, Li H, Wu X, Zhong Y, Zhang K, Zhang YP, et al. Moderate Mutation Rate in the  
392 SARS Coronavirus Genome and Its Implications. *BMC Evol Biol* (2004) 4:21. Epub  
393 20040628. doi: 10.1186/1471-2148-4-21.
- 394 27. Bar-On YM, Flamholz A, Phillips R, Milo R. SARS-CoV-2 (Covid-19) by the Numbers.  
395 *eLife* (2020) 9:e57309. doi: 10.7554/eLife.57309.
- 396 28. Sanjuán R, Nebot MR, Chirico N, Mansky LM, Belshaw R. Viral Mutation Rates. *J Virol*  
397 (2010) 84(19):9733-48. Epub 20100721. doi: 10.1128/jvi.00694-10.
- 398 29. Bauer DC, Tay AP, Wilson LOW, Reti D, Hosking C, McAuley AJ, et al. Supporting  
399 Pandemic Response Using Genomics and Bioinformatics: A Case Study on the Emergent  
400 SARS-CoV-2 Outbreak. *Transbound Emerg Dis* (2020) 67(4):1453-62. doi:  
401 <https://doi.org/10.1111/tbed.13588>.
- 402 30. Koyama T, Platt D, Parida L. Variant Analysis of SARS-CoV-2 Genomes. *Bull World Health*  
403 *Organ* (2020) 98(7):495-504. Epub 2020/06/02. doi: 10.2471/BLT.20.253591.
- 404 31. Australian Government Department of Health. ATAGI statement on defining 'up-to-date'  
405 status for COVID-19 vaccination (2022). Available at: [https://www.health.gov.au/news/atagi-](https://www.health.gov.au/news/atagi-statement-on-defining-up-to-date-status-for-covid-19-vaccination)  
406 [statement-on-defining-up-to-date-status-for-covid-19-vaccination](https://www.health.gov.au/news/atagi-statement-on-defining-up-to-date-status-for-covid-19-vaccination)
- 407 32. Burki TK. Fourth Dose of Covid-19 Vaccines in Israel. *The Lancet Respiratory Medicine*  
408 (2022) 10(2):e19. doi: 10.1016/S2213-2600(22)00010-8.
- 409 33. Regev-Yochay G, Gonen T, Gilboa M, Mandelboim M, Indenbaum V, Amit S, et al. 4th Dose  
410 Covid mRNA Vaccines' Immunogenicity & Efficacy against Omicron VOC. *medRxiv*  
411 (2022):2022.02.15.22270948. doi: 10.1101/2022.02.15.22270948.
- 412 34. Mandelboim M, Personal Communication (22 February 2022) to S.S. Vasan.
- 413 35. May DH, Rubin BER, Dalai SC, Patel K, Shafiani S, Elyanow R, et al. Immunosequencing  
414 and Epitope Mapping Reveal Substantial Preservation of the T Cell Immune Response to  
415 Omicron Generated by SARS-CoV-2 Vaccines. *medRxiv* (2021):2021.12.20.21267877. doi:  
416 10.1101/2021.12.20.21267877.
- 417 36. Keeton R, Tincho MB, Ngomti A, Baguma R, Benede N, Suzuki A, et al. SARS-CoV-2 Spike  
418 T Cell Responses Induced Upon Vaccination or Infection Remain Robust against Omicron.  
419 *medRxiv* (2021):2021.12.26.21268380. doi: 10.1101/2021.12.26.21268380.
- 420 37. Atmar RL, Lyke KE, Deming ME, Jackson LA, Branche AR, El Sahly HM, et al.  
421 Homologous and Heterologous COVID-19 Booster Vaccinations. *New England Journal of*  
422 *Medicine* (2022). doi: 10.1056/NEJMoa2116414.
- 423 38. He Q, Mao Q, An C, Zhang J, Gao F, Bian L, et al. Heterologous Prime-Boost: Breaking the  
424 Protective Immune Response Bottleneck of COVID-19 Vaccine Candidates. *Emerg Microbes*  
425 *Infect* (2021) 10(1):629-37. doi: 10.1080/22221751.2021.1902245.
- 426 39. Jayaraman KS. Ferret Chosen as Animal Model to Test Coronavirus Vaccines. *Nature India*  
427 (5 April 2020). Available at: <http://go.nature.com/39LGAqx>.
- 428 40. Marsh GA, McAuley AJ, Au GG, Riddell S, Layton D, Singanallur NB, et al. ChAdOx1  
429 nCoV-19 (AZD1222) Vaccine Candidate Significantly Reduces SARS-CoV-2 Shedding in  
430 Ferrets. *npj Vaccines* (2021) 6(1):67. doi: 10.1038/s41541-021-00315-6.
- 431 41. Van Doremalen N, Purushotham Jyothi N, Schulz J E, Holbrook M G, Bushmaker T,  
432 Carmody A, et al. Intranasal ChAdOx1 nCov-19/AZD1222 Vaccination Reduces Viral  
433 Shedding after SARS-CoV-2 D614G Challenge in Preclinical Models. *Science Translational*  
434 *Medicine* (2021) 13(607):eabh0755. doi: 10.1126/scitranslmed.abh0755.
- 435 42. Imperial College London. *Landmark coronavirus study to trial inhaled Imperial and Oxford*  
436 *vaccines* (2020). Available at: [https://www.imperial.ac.uk/news/203653/landmark-](https://www.imperial.ac.uk/news/203653/landmark-coronavirus-study-trial-inhaled-imperial/)  
437 [coronavirus-study-trial-inhaled-imperial/](https://www.imperial.ac.uk/news/203653/landmark-coronavirus-study-trial-inhaled-imperial/)

## Neutralization of SARS-CoV-2 Omicron

- 438 43. BBC. *AstraZeneca vaccine: Did nationalism spoil UK's 'gift to the world'?* (2022). Available  
439 at: <https://www.bbc.com/news/health-60259302>
- 440 44. Huang, J. et al. CHARMM36m: an improved force field for folded and intrinsically  
441 disordered proteins. *Nature Methods* (2017) 14, 71-73, doi:10.1038/nmeth.4067
- 442 45. Wrapp, D. et al. Cryo-EM structure of the 2019-nCoV spike in the prefusion conformation.  
443 *Science* (2020) 367, 1260-1263 doi: 10.1126/science.abb2507
- 444 46. Watanabe Y, Allen, JD, Wrapp, J, McLellan, JS, Crispin, M. Site-specific glycan analysis of  
445 the SARS-CoV-2 spike *Science* (2020) 369(6501):330-333. doi: 10.1126/science.abb9983.
- 446 47. Humphrey, W., Dalke, A. and Schulten, K., "VMD - Visual Molecular Dynamics", *J. Molec.*  
447 *Graphics*, 1996, vol. 14, pp. 33-38.41

## Neutralization of SARS-CoV-2 Omicron

448 **Figures 1-4**

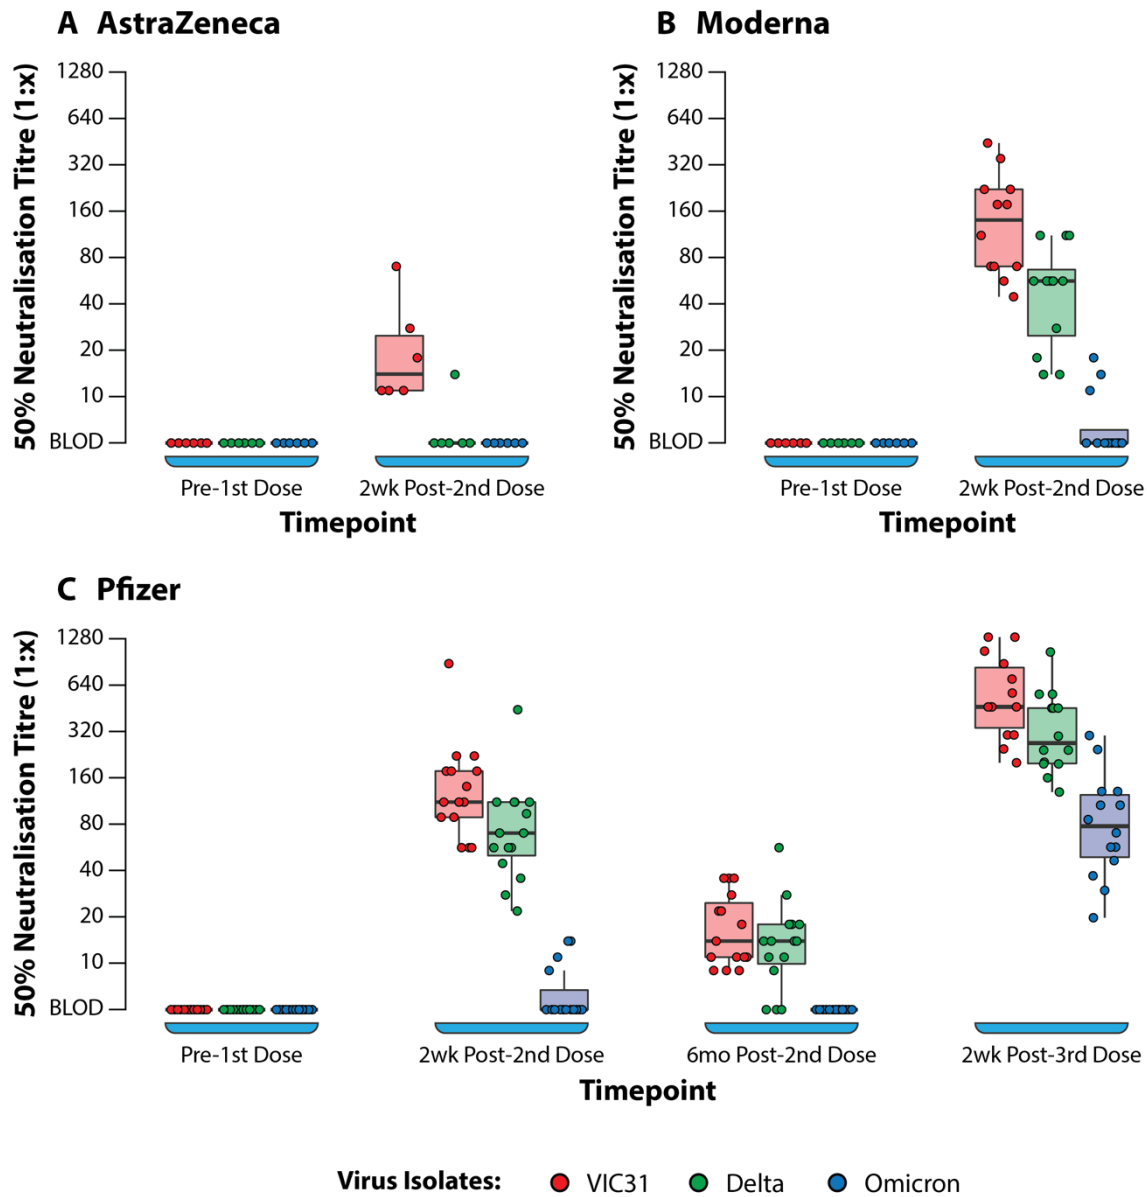

449

450 **Figure 1: Box Plots Showing 50% Neutralisation Titres (NT<sub>50</sub>) Against SARS-CoV-2 Variants**  
451 **of Concern with Plasma from Human Volunteers**

452 Neutralisation of VIC31, Delta, and Omicron by human donor samples collected at different  
453 timepoints following vaccination with AstraZeneca (A), Moderna (B), or Pfizer (C) COVID-19  
454 vaccines. The bold horizontal line represents median titre, with the 1st and 3rd quartiles represented  
455 by the box. Statistical analysis is provided in Supplementary Table S3.

## Neutralization of SARS-CoV-2 Omicron

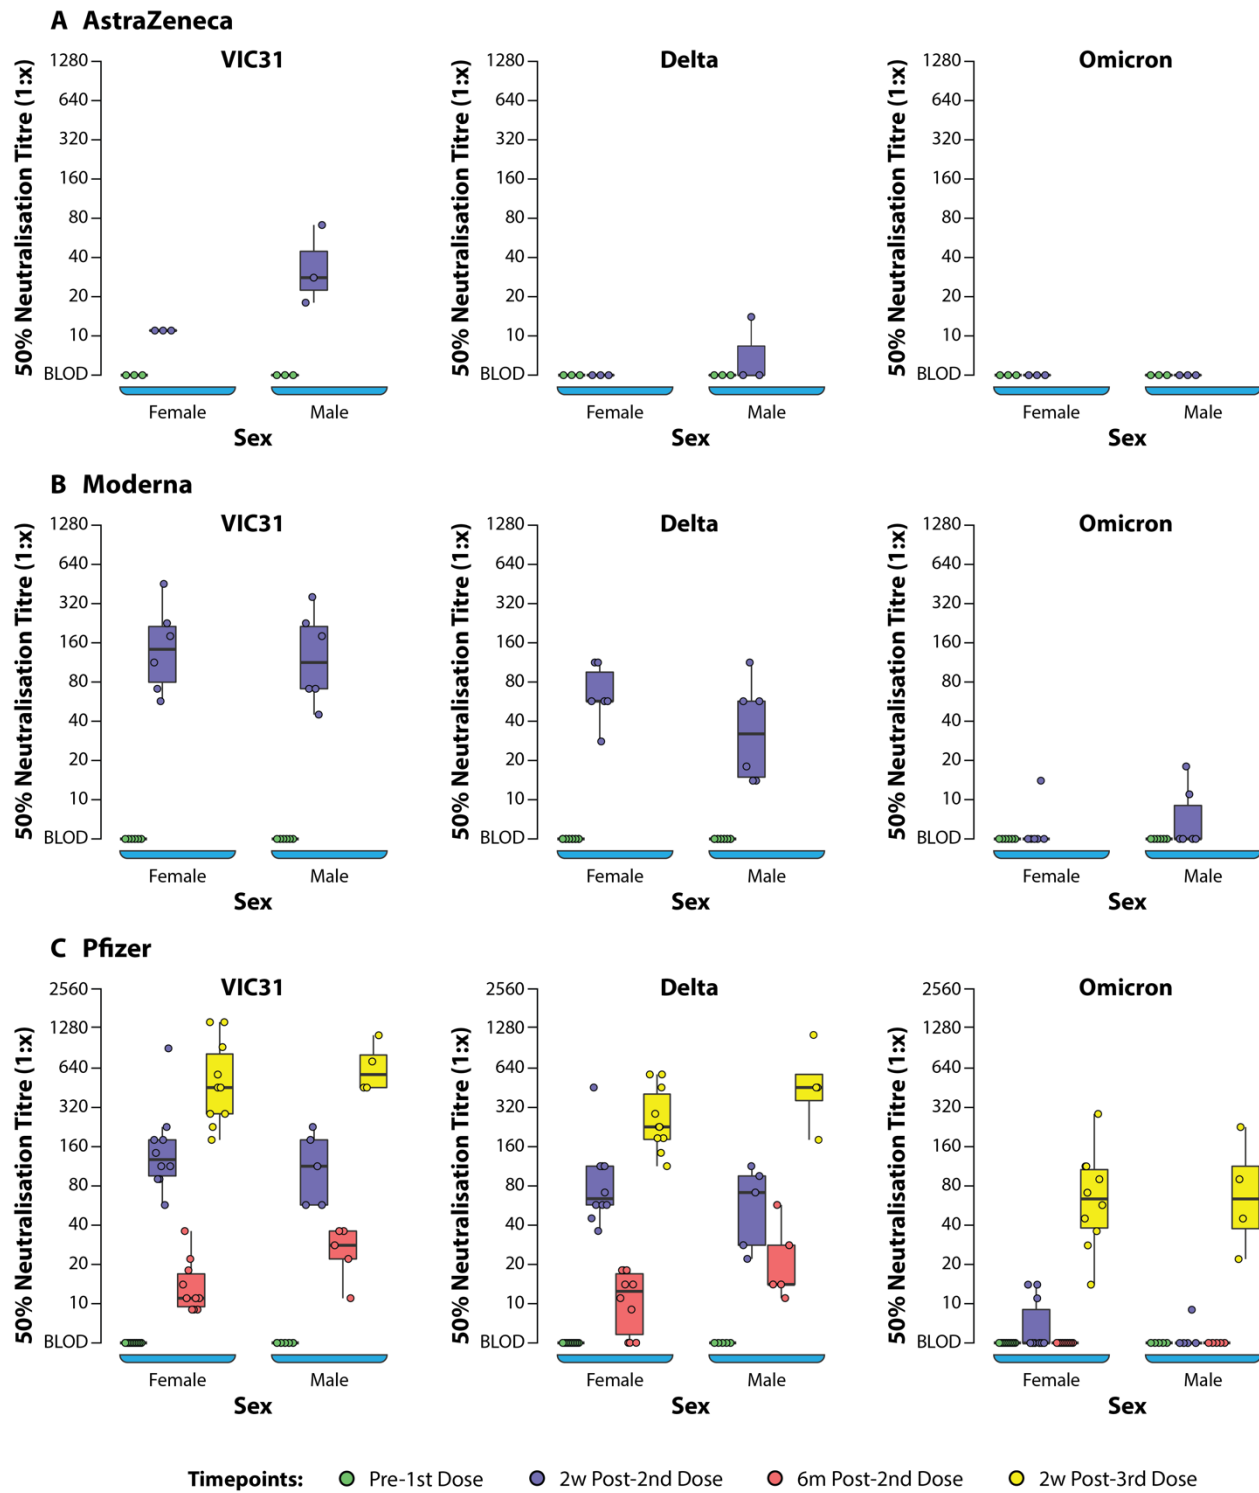

456

457 **Figure 2: Box Plots Showing 50% Neutralization Titres (NT<sub>50</sub>) Against SARS-CoV-2 Variants**  
 458 **of Concern Assessed by Sex of Donors**

459 Plasma samples from human volunteers vaccinated with either AstraZeneca (A), Moderna (B), or  
 460 Pfizer (C) vaccines were tested in neutralisation assays against VIC31 (i), Delta (ii), and Omicron  
 461 (iii), with titres assessed with respect to sex. The bold horizontal line represents median titre, with the

## *Neutralization of SARS-CoV-2 Omicron*

462 1st and 3rd quartiles represented by the box. Statistical analysis is provided in Supplementary Table  
463 S3.

## Neutralization of SARS-CoV-2 Omicron

464

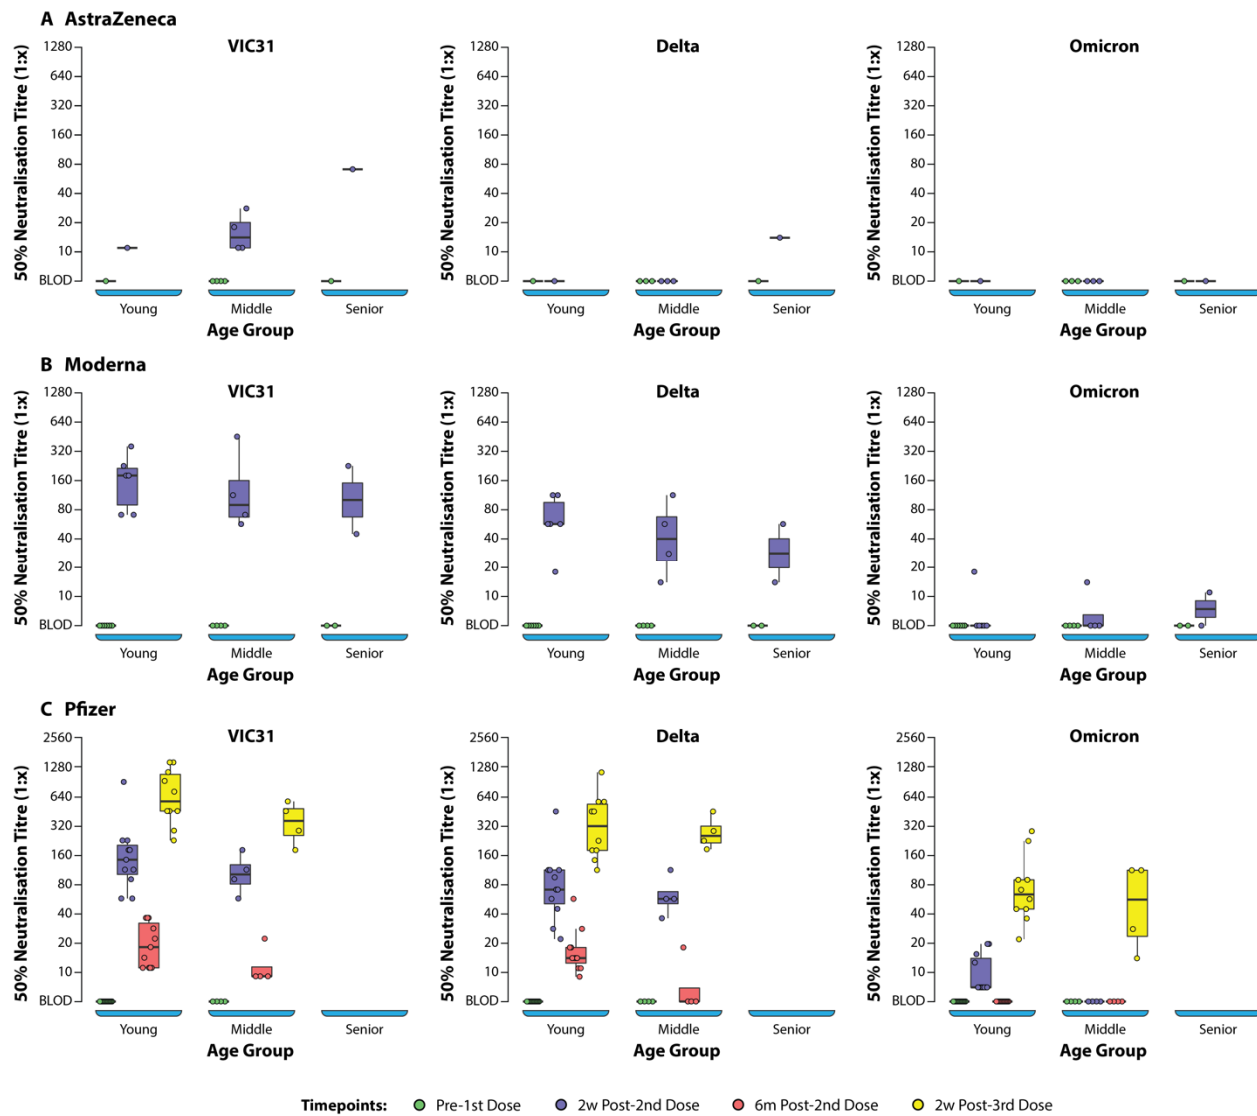

465

466 **Figure 3: Box Plots Showing NT<sub>50</sub> Values Against SARS-CoV-2 Variants of Concern Assessed**  
 467 **by Age Group**

468 Plasma samples from human volunteers vaccinated with either AstraZeneca (A), Moderna (B), or  
 469 Pfizer (C) vaccines were tested in neutralisation assays against VIC31 (i), Delta (ii), and Omicron  
 470 (iii), with titres assessed with respect to age group. The bold horizontal line represents median titre,  
 471 with the 1st and 3rd quartiles represented by the box. Statistical analysis is provided in  
 472 Supplementary Table S3.

## Neutralization of SARS-CoV-2 Omicron

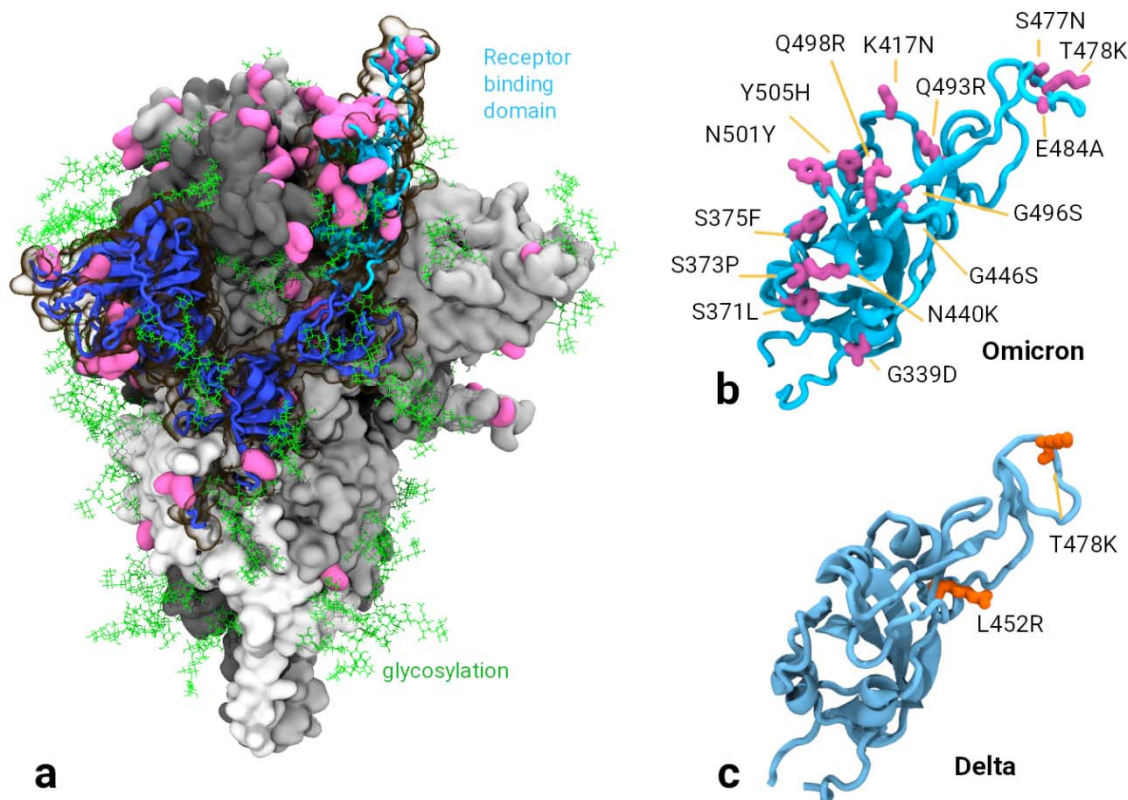

473

### 474 **Figure 4: Structure of SARS-CoV-2 Spike Protein and Mutations of Interest**

475 **A.** The Omicron spike protein with mutations shown in pink. A single S1 domain is highlighted in  
476 blue with the receptor binding domain (RBD) in the 'up' configuration is highlighted in cyan.

477 **B. & C.** Comparison of the RBD in the Omicron and Delta  
478 variants, 15 mutations are observed in Omicron while only 2 in the Delta variant.



## Neutralization of SARS-CoV-2 Omicron

479 **Tables 1 & 2**

480 **Table 1: Information on Human Participants, Vaccines, and Blood Collection Schedule**

|                         |                               | AstraZeneca  | Moderna       | Pfizer         |
|-------------------------|-------------------------------|--------------|---------------|----------------|
| Donor                   |                               | n=6          | n=12          | n=15           |
| Sex                     | Male                          | n=3          | n=6           | n=5            |
|                         | Female                        | n=3          | n=6           | n=10*          |
| Age<br>[Median (Range)] | Male                          | 58 (57-65)   | 41.5 (29-70)  | 31 (29-35)     |
|                         | Female                        | 57 (31-59)   | 38.5 (27-47)  | 33.5 (25-57)   |
|                         | Overall                       | 57.5 (31-65) | 38.5(27-70)   | 33 (25-57)     |
| Samples Used            | pre-1 <sup>st</sup> Dose      | n=6 (3M, 3F) | n=12 (6M, 6F) | n=15 (5M, 10F) |
|                         | 2w Post-2 <sup>nd</sup> Dose  | n=6 (3M, 3F) | n=12 (6M, 6F) | n=15 (5M, 10F) |
|                         | 6mo Post-2 <sup>nd</sup> Dose |              |               | n=15 (5M, 10F) |
|                         | 2w Post-3 <sup>rd</sup> Dose  |              |               | n=14 (4M, 10F) |

481 \*For pre-1<sup>st</sup> dose and 2w Post-2<sup>nd</sup> dose the samples are gender balanced.

482

483 **Table 2: Sex-Based Mean and Standard Deviation for VNT Titres Against SARS-CoV-2**  
 484 **Variants for Human Subjects Vaccinated with Different COVID-19 Vaccines.**

| Vaccine     | Sex    | Estimates | VIC31 |      |      |      | Delta |      |      |      | Omicron |      |      |      |
|-------------|--------|-----------|-------|------|------|------|-------|------|------|------|---------|------|------|------|
|             |        |           | 1     | 2    | 3    | 4    | 1     | 2    | 3    | 4    | 1       | 2    | 3    | 4    |
| AstraZeneca | Female | Mean      | 2.32  | 3.46 | X    | X    | 2.32  | 2.32 | X    | X    | 2.32    | 2.32 | X    | X    |
|             |        | SD        | 0.00  | 0.00 | X    | X    | 0.00  | 0.00 | X    | X    | 0.00    | 0.00 | X    | X    |
|             | Male   | Mean      | 2.32  | 5.04 | X    | X    | 2.32  | 2.82 | X    | X    | 2.32    | 2.32 | X    | X    |
|             |        | SD        | 0.00  | 1.01 | X    | X    | 0.00  | 0.86 | X    | X    | 0.00    | 0.00 | X    | X    |
|             | All    | Mean      | 2.32  | 4.25 | X    | X    | 2.32  | 2.57 | X    | X    | 2.32    | 2.32 | X    | X    |
|             |        | SD        | 0.00  | 1.08 | X    | X    | 0.00  | 0.61 | X    | X    | 0.00    | 0.00 | X    | X    |
| Moderna     | Female | Mean      | 2.32  | 7.16 | X    | X    | 2.32  | 5.99 | X    | X    | 2.32    | 2.57 | X    | X    |
|             |        | SD        | 0.00  | 1.11 | X    | X    | 0.00  | 0.76 | X    | X    | 0.00    | 0.61 | X    | X    |
|             | Male   | Mean      | 2.32  | 6.93 | X    | X    | 2.32  | 5.05 | X    | X    | 2.32    | 2.82 | X    | X    |
|             |        | SD        | 0.00  | 1.17 | X    | X    | 0.00  | 1.28 | X    | X    | 0.00    | 0.80 | X    | X    |
|             | All    | Mean      | 2.32  | 7.04 | X    | X    | 2.32  | 5.52 | X    | X    | 2.32    | 2.69 | X    | X    |
|             |        | SD        | 0.00  | 1.09 | X    | X    | 0.00  | 1.12 | X    | X    | 0.00    | 0.69 | X    | X    |
| Pfizer      | Female | Mean      | 2.32  | 7.22 | 3.75 | 8.93 | 2.32  | 6.36 | 3.37 | 7.39 | 2.32    | 2.73 | 2.32 | 5.95 |
|             |        | SD        | 0.00  | 1.08 | 0.66 | 1.07 | 0.00  | 1.04 | 0.79 | 0.82 | 0.00    | 0.67 | 0.00 | 1.22 |
|             | Male   | Mean      | 2.32  | 6.76 | 4.61 | 9.32 | 2.32  | 5.76 | 4.34 | 8.82 | 2.32    | 2.49 | 2.32 | 6.07 |
|             |        | SD        | 0.00  | 0.92 | 0.71 | 0.64 | 0.00  | 1.06 | 0.97 | 1.09 | 0.00    | 0.38 | 0.00 | 1.43 |
|             | All    | Mean      | 2.32  | 7.07 | 4.04 | 9.04 | 2.32  | 6.16 | 3.70 | 8.23 | 2.32    | 2.65 | 2.32 | 5.99 |
|             |        | SD        | 0.00  | 1.02 | 0.78 | 0.96 | 0.00  | 1.05 | 0.95 | 0.94 | 0.00    | 0.59 | 0.00 | 1.23 |

485 All VNT titres expressed as Log2 values. Values indicated as 2.32 represent titres below the assay detection limit. SD =  
 486 Standard Deviation of Mean; 1 = pre-1<sup>st</sup> dose; 2 = 2wk Post-2<sup>nd</sup> dose; 3 = 6mo Post-2<sup>nd</sup> dose and 4 = 2wk Post-3<sup>rd</sup> dose. X  
 487 = sample not available for analysis

488

## 489 **Data Availability Statement**

490 The original contributions presented in the study are included in the article/Supplementary Material.  
491 Further inquiries can be directed to the corresponding author.

## 492 **Ethics Statement**

493 The study protocols were approved by institutional ethics committees of the Peter Doherty Institute,  
494 Melbourne Australia [University of Melbourne Central Human Research Ethics Committee (2021-  
495 21198-15398-3)] and the CSIRO (CSIRO Human Research Ethics Committee ID 2021\_123\_RR).  
496 The reference serum for the neutralisation assay was derived from an animal study reviewed and  
497 approved by CSIRO ACDP Animal Ethics Committee (AEC 2004).

## 498 **Author Contributions**

499 NBS designed the study with PJvV, AJM, SMG and SSV. PJvV and AJM performed the experiments  
500 with NBS, MPB, SR and SG. NBS and SMG analysed the experimental data and provided statistical  
501 interpretations, with inputs from PJvV, AJM, TWD and SSV. MJK performed biomolecular  
502 modelling and provided structural interpretations. LC and JDD isolated the virus variants, which  
503 were sequenced by KRB and MT. JAJ, SJK and AKW provided the human plasma samples and  
504 obtained the necessary funding for the same. SM, SC and SSV analysed the health economic  
505 implications. NBS, PJvV, AJM, MJK, SM, SC and SSV co-wrote the manuscript, and all authors  
506 contributed to revisions and creation of the final version. SV conceived the project and  
507 obtained funding.

## 508 **Funding**

509 This work was supported by funding (Principal Investigator: S.S.V.) from the CSIRO's Precision  
510 Health & Responsible Innovation Future Science Platforms, National Health and Medical Research  
511 Council (grant MRF2009092), and United States Food and Drug Administration (FDA) Medical  
512 Countermeasures Initiative (contract 75F40121C00144). J.A.J., S.J.K. and A.K.W. are grateful to the  
513 National Health and Medical Research Council (for grants GNT2002073, MRF2005544,  
514 GNT1149990, fellowships and an investigator grant). We also thank the Victorian Government,  
515 especially the Victorian Department of Health and Human Services, the major funder of the Victorian  
516 Infectious Diseases Reference Laboratory and Barwon Health. The article reflects the views of the  
517 authors and does not represent the views or policies of the funding agencies including the FDA.

## 518 **Conflict of Interest**

519 All claims expressed in this article are solely those of the authors and do not necessarily represent  
520 those of their affiliated organizations, or those of the publisher, the editors and the reviewers. Any  
521 product that may be evaluated in this article, or claim that may be made by its manufacturer, is not  
522 guaranteed or endorsed by the publisher.

## 523 **Acknowledgments**

524 The authors are grateful for support from Professor Sharon Lewin, Professor Deborah Williamson  
525 and colleagues at the Peter Doherty Institute for Infection and Immunity  
526 (<https://www.grid.ac/institutes/grid.483778.7>); the CSIRO eHealth programme (particularly Drs  
527 Laurence Wilson and Carol Lee); and the CSIRO's Australian Centre for Disease Preparedness

## *Neutralization of SARS-CoV-2 Omicron*

528 (ACDP; <https://www.grid.ac/institutes/grid.413322.5>), especially Dr Daniel Layton and Kristen  
529 McAuley. We thank Dr Amy Shurtleff of the Coalition for Epidemic Preparedness Innovations and  
530 the University of Oxford's Professors Teresa Lambe and Dame Sarah Gilbert for access to positive  
531 control ferret sera from their study (CSIRO ACDP Animal Ethics Committee Approval Reference:  
532 AEC 2004).

## Neutralization of SARS-CoV-2 Omicron

### 533 Supplementary Material

### 534 Supplementary Tables S1 to S3

### 535 Supplementary Table S1: Comparison for NT50 values on 2<sup>nd</sup>-2wk

| Comparison        | Variant | Estimate<br>(‘adjusted’ p-value) |
|-------------------|---------|----------------------------------|
| Pfizer vs Moderna | VIC31   | p > 0.100                        |
| Pfizer vs Moderna | Omicron | p > 0.100                        |
| Pfizer vs Moderna | Delta   | p > 0.100                        |

536

### 537 Supplementary Table S2: One-way ANOVA results for vaccines, variants, sex, age and day 538 post vaccination/boosters

| Vaccine     | Variable                     | F-value | p-value | Tukey’s HSD post hoc Comparison<br>(‘adjusted’ p-value)                                                                                                                                                                                                                                                                                                                                                                                             |
|-------------|------------------------------|---------|---------|-----------------------------------------------------------------------------------------------------------------------------------------------------------------------------------------------------------------------------------------------------------------------------------------------------------------------------------------------------------------------------------------------------------------------------------------------------|
| Pfizer      | Sex                          | 0.002   | >0.100  | No significant difference                                                                                                                                                                                                                                                                                                                                                                                                                           |
|             | Age                          | 0.667   | >0.100  | No significant difference                                                                                                                                                                                                                                                                                                                                                                                                                           |
|             | Day post vaccination/booster | 119.9   | <0.0001 | Pre 1 <sup>st</sup> Dose – 2wk Post-2 <sup>nd</sup> Dose p < 0.0001<br>Pre 1 <sup>st</sup> Dose – 6mo Post-2 <sup>nd</sup> Dose p < 0.01<br>Pre 1 <sup>st</sup> Dose – 2wk Post-3 <sup>rd</sup> Dose p < 0.0001<br>2wk Post 2 <sup>nd</sup> Dose – 6mo Post-2 <sup>nd</sup> Dose p < 0.0001<br>2wk Post 2 <sup>nd</sup> Dose – 2wk Post-3 <sup>rd</sup> Dose p < 0.0001<br>6mo Post 2 <sup>nd</sup> Dose – 2wk Post-3 <sup>rd</sup> Dose p < 0.0001 |
|             | Variant                      | 15.86   | <0.0001 | Delta – Omicron p < 0.0001<br>VIC31 – Omicron p < 0.0001                                                                                                                                                                                                                                                                                                                                                                                            |
| Moderna     | Sex                          | 0.104   | >0.100  | No significant difference                                                                                                                                                                                                                                                                                                                                                                                                                           |
|             | Age                          | 0.074   | >0.100  | No significant difference                                                                                                                                                                                                                                                                                                                                                                                                                           |
|             | Day post vaccination/booster | 64.56   | <0.0001 | Pre 1 <sup>st</sup> Dose – 2wk Post-2 <sup>nd</sup> Dose p < 0.0001                                                                                                                                                                                                                                                                                                                                                                                 |
|             | Variant                      | 8.839   | <0.001  | Delta – Omicron p < 0.05<br>VIC31 – Omicron p < 0.001                                                                                                                                                                                                                                                                                                                                                                                               |
| AstraZeneca | Sex                          | 1.497   | >0.100  | No significant difference                                                                                                                                                                                                                                                                                                                                                                                                                           |
|             | Age                          | 1.401   | >0.100  | No significant difference                                                                                                                                                                                                                                                                                                                                                                                                                           |
|             | Day post vaccination/booster | 7.722   | <0.01   | Pre 1 <sup>st</sup> Dose – 2wk Post-2 <sup>nd</sup> Dose p < 0.01                                                                                                                                                                                                                                                                                                                                                                                   |
|             | Variant                      | 5.744   | <0.01   | VIC31 – Delta p < 0.05<br>VIC31 – Omicron p < 0.05                                                                                                                                                                                                                                                                                                                                                                                                  |

539

540

541

542

## Neutralization of SARS-CoV-2 Omicron

543 **Supplementary Table S3: Two-way ANOVA results of interactions for vaccines, variants, sex,**  
 544 **age and day post vaccination/boosters**

| Vaccine     | Factor 1 | Factor 2                     | F-Value | p-Value              | Tukey's HSD post hoc Comparison ('adjusted' p-value)                                                                         |
|-------------|----------|------------------------------|---------|----------------------|------------------------------------------------------------------------------------------------------------------------------|
| Pfizer      | Variant  | Sex                          | 0.053   | >0.100               | No significant difference                                                                                                    |
|             |          | Age                          | 0.018   | >0.100               | No significant difference                                                                                                    |
|             |          | Day post vaccination/booster | 24.54   | <0.0001 <sup>†</sup> | Pre 1 <sup>st</sup> Dose – 2wk Post-2 <sup>nd</sup> Dose p < 0.0001                                                          |
|             |          |                              |         |                      | Pre 1 <sup>st</sup> Dose – 6mo Post-2 <sup>nd</sup> Dose p < 0.0001                                                          |
|             |          |                              |         |                      | Pre 1 <sup>st</sup> Dose – 2wk Post-3 <sup>rd</sup> Dose p < 0.0001                                                          |
|             |          |                              |         |                      | 2wk Post 2 <sup>nd</sup> Dose – 6mo Post-2 <sup>nd</sup> Dose p < 0.0001                                                     |
|             |          |                              |         |                      | 2wk Post 2 <sup>nd</sup> Dose – 2wk Post-3 <sup>rd</sup> Dose p < 0.0001                                                     |
|             |          |                              |         |                      | 6mo Post 2 <sup>nd</sup> Dose – 2wk Post-3 <sup>rd</sup> Dose p < 0.0001                                                     |
|             |          |                              |         |                      | Delta – Omicron p < 0.0001                                                                                                   |
|             |          |                              |         |                      | VIC31 – Omicron p < 0.0001                                                                                                   |
| Moderna     | Variant  | Sex                          | 0.158   | >0.100               | No significant difference                                                                                                    |
|             |          | Age                          | 0.040   | >0.100               | No significant difference                                                                                                    |
|             |          | Day post vaccination/booster | 59.91   | <0.0001 <sup>†</sup> | Pre 1 <sup>st</sup> Dose – 2wk Post-2 <sup>nd</sup> Dose p < 0.0001<br>Delta – Omicron p < 0.05<br>VIC31 – Omicron p < 0.001 |
| AstraZeneca | Variant  | Sex                          | 0.872   | >0.100               | No significant difference                                                                                                    |
|             |          | Age                          | 0.507   | >0.100               | No significant difference                                                                                                    |
|             |          | Day post vaccination/booster | 13.00   | <0.0001 <sup>†</sup> | Pre 1 <sup>st</sup> Dose – 2wk Post-2 <sup>nd</sup> Dose p < 0.01                                                            |
|             |          |                              |         |                      | Delta – Omicron p < 0.05<br>VIC31 – Omicron p < 0.05                                                                         |

545 <sup>†</sup>In two-way ANOVA the main effect for variant was statistically significant (p < 0.0001). However, the interaction  
 546 effects of variant with age or sex were not statistically significant (p > 0.05) but there were statistically significant  
 547 interactions between the effects of variant and day post vaccination/booster (p < 0.001).  
 548  
 549

550 **Supplementary Methods**

551

552 **Statistical analysis using linear mixed models**

553

554 Linear Mixed Models (*lm* and *lmer*) analyses were used to investigate the interactions of age,  
555 sex, vaccine, and day post vaccination/booster with neutralising antibody titres to the three different  
556 virus variants using ‘*lme4*’ library in R [15]. To avoid, over fitting of data, we are not showing the  
557 results of *lm* and *lme* analyses. One-way and two-way ANOVA analyses showed that, for all  
558 vaccines (Pfizer, Moderna and AstraZeneca), day post vaccination/booster and virus variant were the  
559 main contributors to differences in neutralising antibody responses, while age and sex did not have  
560 significant effects.

561

562 Linear Mixed Model analysis of the variance between variables (results not shown) confirmed  
563 the ANOVA analyses which showed that day post vaccination/booster and virus variant are the major  
564 contributors to titre differences, but further shows that there was a significant difference in  
565 neutralising titres elicited by the three different vaccines, mostly due to poor responses to the  
566 AstraZeneca vaccine. This analysis model further suggests that younger individuals (aged less than  
567 35 years) are likely to have a stronger neutralising antibody response than older individuals, but we  
568 concede that this finding might be confounded by the distribution of the ages within the vaccine  
569 groups. This might also explain the poorer responses in the AstraZeneca group because of the  
570 vaccine advice in Australia (AstraZeneca mostly used in the older age group).

571 **Modelling using *in silico* methods**

572 Molecular simulations were performed using NAMD2.14 with CHARM36m forcefield [44]  
573 employing a TIP3 water model. The Spike model was based on the pdb structure 6VSB3 [45], built  
574 with additions segments predicted with AlphaFold. The Spike protein only included residues 13 to  
575 1160 (omitting transmembrane domain, to reduce the simulation size). Glycosylation of the Spike  
576 protein was manually constructed using Visual Molecular Dynamics (VMD) guided by glycan  
577 analysis [46]. Omicron models were constructed in two conformations, all RBD ‘down’, and 2 RBD  
578 ‘down’ one RBD ‘up’. Both models included an ACE2 domain in the expected binding position.

579 Simulations were run with Periodic Boundary Conditions ‘PBCs’ using the NPT ensemble at  
580 310K and 1 bar pressure employing Langevin dynamics. The PBCs were constant in the XY  
581 dimensions. Long-range Coulomb forces were computed with the Particle Mesh Ewald method with  
582 a grid spacing of 1 Å. 2 fs timesteps were used with non-bonded interactions calculated every 2 fs  
583 and full electrostatics every 4 fs while hydrogens were constrained with the ‘SHAKE’ algorithm. The  
584 cut-off distance was 12 Å with a switching distance of 10 Å and a pair-list distance of 14 Å. Pressure  
585 was controlled to 1 atmosphere using the NoséHoover Langevin piston method employing a piston  
586 period of 100 fs and a piston decay of 50 fs. Trajectory frames were captured every 100 ps.  
587 Simulations were performed for at least 200 nanoseconds. Trajectories were visualized and analysed  
588 using VMD [47].

589

590 **Supplementary Figures**

591

592

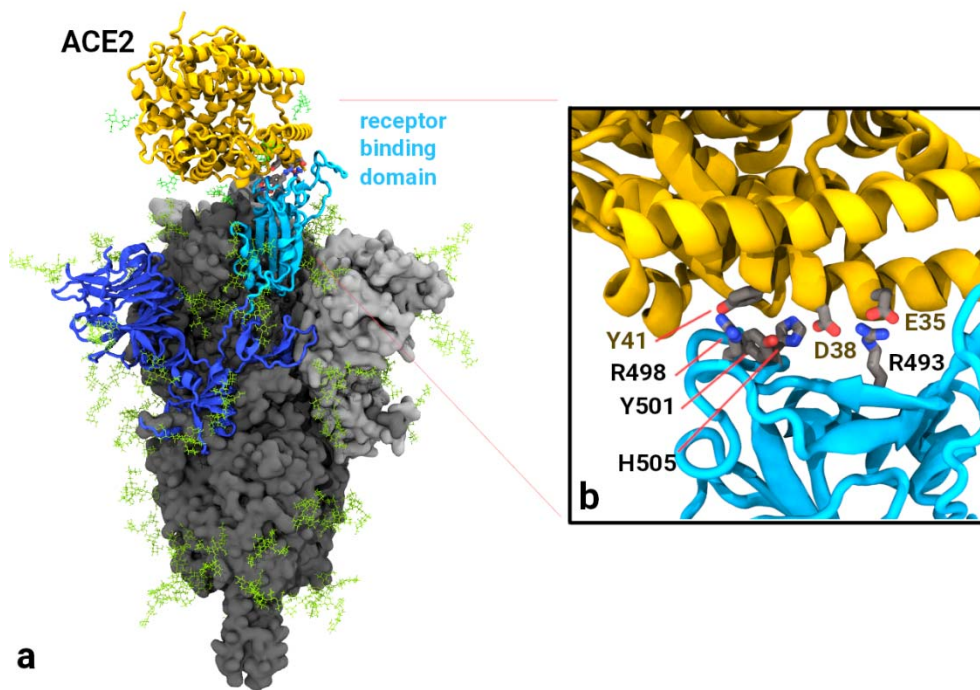

593

594

595

596

597 **Supplementary Figure S1.** a) Omicron spike protein binding to ACE2 domain (shown in yellow).  
598 S1 domain shown in blues, with the receptor binding domain shown in cyan. Glycosylation is shown  
599 as green sticks. b) close up of the ACE2 binding interface of Omicron spike RBD showing the  
600 interaction of contacting residues.

601

## Neutralization of SARS-CoV-2 Omicron

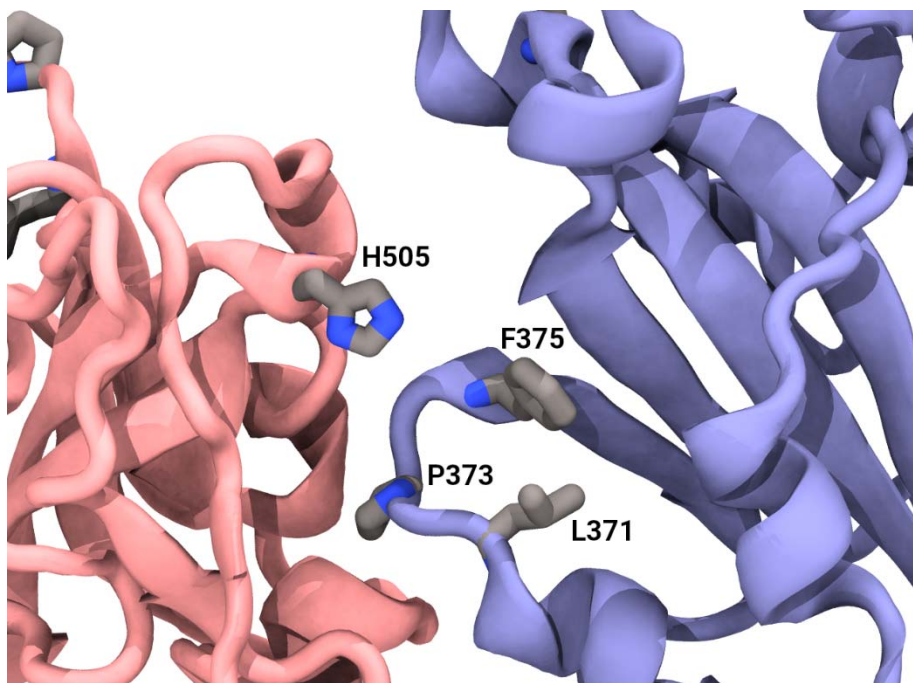

602

603 **Supplementary Figure S2.** Close up of Omicron mutations in adjacent receptor binding domains  
604 (pink and blue) in ‘down’ position showing the close proximity of residues L371, P373 and F375 on  
605 the blue domain to the adjacent H505. This complementary arrangement may have influence on the  
606 RBD ‘up’/‘down’ transitions by pH dependant ionization of H505.

607
